# Supplementary material for: Wnt ligands influence tumour initiation by controlling the number of intestinal stem cells
Source: PubMed Central journal article supplement (PMC5859272; doi:10.1038/s41467-018-03426-2), 2018-03-19
Supplement: 41467_2018_3426_MOESM3_ESM.pdf [file 41467_2018_3426_MOESM3_ESM.pdf]

## Description of Additional Supplementary Files

**File Name: Supplementary Data 1**

**Description:** Raw reads of the significantly deregulated genes between vehicle and Porcupine inhibitor treated mice.
